# Supplementary material for: Disentangling the impacts of heat wave magnitude, duration and timing on the structure and diversity of sessile marine assemblages
Source: PubMed Central journal article supplement (PMC4380158; doi:10.7717/peerj.863), 2015-03-26
Supplement: peerj-03-863-s005.pdf [file peerj-03-863-s005.pdf]

Table S1. List of species recorded on panels, with NIS status in the UK, life history strategy (colonial versus solitary) and occurrence of each species (i.e. % of panels on which species was recorded) also shown.

| Taxon                            | Species                       | Non-native?             | Colonial? | Occurrence (%) |
|----------------------------------|-------------------------------|-------------------------|-----------|----------------|
| Ascidians                        | <i>Aplidium glabrum</i>       | N                       | Y         | 1              |
|                                  | <i>Asciella aspersa</i>       | N                       | N         | 98             |
|                                  | <i>Asterocarpa humilis</i>    | Y                       | N         | 60             |
|                                  | <i>Botrylloides leachii</i>   | N                       | Y         | 1              |
|                                  | <i>Botryllus schlosseri</i>   | N                       | Y         | 100            |
|                                  | <i>Ciona intestinalis</i>     | N                       | N         | 99             |
|                                  | <i>Clavelina lepadiformis</i> | N                       | Y         | 98             |
|                                  | <i>Corella eumyota</i>        | Y                       | N         | 91             |
|                                  | <i>Didemnid</i> sp.           | N                       | Y         | 50             |
|                                  | <i>Diplosoma listerianum</i>  | N                       | Y         | 100            |
|                                  | <i>Molgula</i> sp.            | N                       | N         | 73             |
|                                  | <i>Morchellium argus</i>      | N                       | Y         | 6              |
|                                  | Bryozoans                     | <i>Bowerbankia</i> sp.  | N         | Y              |
| <i>Bugula fulva</i>              |                               | N                       | Y         | 32             |
| <i>Bugula neritina</i>           |                               | Y                       | Y         | 69             |
| <i>Callopora dumerilii</i>       |                               | Y                       | Y         | 19             |
| <i>Celloporella hyalina</i>      |                               | N                       | Y         | 6              |
| <i>Conopeum</i> sp.              |                               | N                       | Y         | 24             |
| <i>Cryptosula pallasina</i>      |                               | N                       | Y         | 46             |
| <i>Electra pilosa</i>            |                               | N                       | Y         | 72             |
| Cheilostome bryozoan species A   |                               | N                       | Y         | 1              |
| <i>Membranipora membranipora</i> |                               | N                       | Y         | 2              |
| <i>Tricellaria inopinata</i>     |                               | Y                       | Y         | 97             |
| <i>Watersipora subtorquata</i>   |                               | Y                       | Y         | 31             |
| Crustaceans                      |                               | <i>Balanus crenatus</i> | N         | N              |
|                                  | <i>Balanus perforatus</i>     | N                       | N         | 23             |
|                                  | <i>Austrominius modestus</i>  | Y                       | N         | 20             |
|                                  | <i>Verucca stroemia</i>       | N                       | N         | 1              |
| Cnidarians                       | <i>Anemone</i> sp.            | N                       | N         | 13             |
| Molluscs                         | <i>Anomia</i> sp.             | N                       | N         | 41             |
|                                  | <i>Mytilus</i> sp.            | N                       | N         | 12             |
| Polychaetes                      | <i>Spirobranchus</i> sp.      | N                       | N         | 100            |
|                                  | <i>Spirorbis spirorbis</i>    | N                       | N         | 13             |
| Sponges                          | Sponge sp.                    | N                       | Y         | 7              |
