# Supplementary material for: Disentangling the impacts of heat wave magnitude, duration and timing on the structure and diversity of sessile marine assemblages
Source: PubMed Central journal article supplement (PMC4380158; doi:10.7717/peerj.863), 2015-03-26
Supplement: peerj-03-863-s006.pdf [file peerj-03-863-s006.pdf]

Table S2. Univariate permutational ANOVAs to test for differences in assemblage level metrics between HW Timings and Magnitudes, based on final values of total abundance (a,b), species richness (c,d) and dry weight biomass (e,f). Permutations (4999 under a reduced model) were based on Euclidean distances between untransformed data. Main tests were conducted on both the 1-week (a,c,e) and 2-week (b,d,f) HW duration experiments separately. Significant P values (at  $P < 0.05$ ) are shown in bold. Significant HW Magnitude effects were investigated further with post-hoc pairwise comparisons.

**(a) Total abundance – 1 week HW duration experiment**

| Source       | df | SS      | F     | P            |
|--------------|----|---------|-------|--------------|
| HW Magnitude | 3  | 49424   | 2.59  | 0.063        |
| HW Timing    | 2  | 768280  | 60.44 | <b>0.001</b> |
| Ti x Ma      | 6  | 15791   | 0.41  | 0.85         |
| Residual     | 52 | 330480  |       |              |
| Total        | 63 | 1149200 |       |              |

**(b) Total abundance – 2 week HW duration experiment**

| Source       | df | SS      | F     | P            |
|--------------|----|---------|-------|--------------|
| HW Magnitude | 3  | 466090  | 18.26 | <b>0.001</b> |
| HW Timing    | 2  | 125410  | 73.73 | <b>0.001</b> |
| Ti x Ma      | 6  | 105810  | 2.07  | 0.098        |
| Residual     | 52 | 442220  |       |              |
| Total        | 63 | 2209700 |       |              |

*Post-hoc tests for HW Magnitude :  $FC \neq C = T1 = T2$*

**(c) Species richness – 1 week HW duration experiment**

| Source       | df | SS     | F     | P            |
|--------------|----|--------|-------|--------------|
| HW Magnitude | 3  | 43.01  | 2.89  | 0.055        |
| HW Timing    | 2  | 207.09 | 20.94 | <b>0.001</b> |
| Ti x Ma      | 6  | 20.91  | 0.70  | 0.645        |
| Residual     | 52 | 257.12 |       |              |
| Total        | 63 | 523.75 |       |              |

**(d) Species richness – 2 week HW duration experiment**

| Source       | df | SS     | F     | P            |
|--------------|----|--------|-------|--------------|
| HW Magnitude | 3  | 121.45 | 10.34 | <b>0.001</b> |
| HW Timing    | 2  | 264.36 | 33.77 | <b>0.001</b> |
| Ti x Ma      | 6  | 19.90  | 0.85  | 0.542        |
| Residual     | 52 | 203.52 |       |              |
| Total        | 63 | 602.44 |       |              |

*Post-hoc tests for HW Magnitude : FC ≠ C = T1 = T2*

**(e) Total biomass – 1 week HW duration experiment**

| Source       | df | SS     | F     | P            |
|--------------|----|--------|-------|--------------|
| HW Magnitude | 3  | 23.81  | 1.55  | 0.196        |
| HW Timing    | 2  | 531.18 | 51.88 | <b>0.001</b> |
| Ti x Ma      | 6  | 48.16  | 1.57  | 0.172        |
| Residual     | 52 | 266.16 |       |              |
| Total        | 63 | 849.81 |       |              |

**(f) Total biomass – 2 week HW duration experiment**

| Source       | df | SS     | F     | P            |
|--------------|----|--------|-------|--------------|
| HW Magnitude | 3  | 10.19  | 0.44  | 0.735        |
| HW Timing    | 2  | 497.91 | 32.59 | <b>0.001</b> |
| Ti x Ma      | 6  | 63.42  | 1.38  | 0.225        |
| Residual     | 52 | 397.19 |       |              |
| Total        | 63 | 953.28 |       |              |
