# Supplementary material for: Disentangling the impacts of heat wave magnitude, duration and timing on the structure and diversity of sessile marine assemblages
Source: PeerJ. 2015 Mar 26;3:e863. doi: 10.7717/peerj.863 (PMC4380158; doi:10.7717/peerj.863)
Supplement: Supplemental Information 9 — Abundances of taxa recorded on each sample. [file peerj-03-863-s009.xlsx]

## Sheet: Sheet1
SAMPLE	Ascidiella aspersa	Aplidium glabrum	Asterocarpa humilis	Anemone sp.	Anomia sp.	Austrominius modestus	Balanus crenatus	Bugula fulva	Botryllid sp.	Bugula neritina	Botryllus schlosseri	Bowerbankis sp.	Callopora dumerilii	Corella eumyota	Celleporella hyalina	Ciona intestinalis	Clavelina lepadiformis	Conopeum sp.	Cryptosula pallasiana	Diplosoma listerianum	Didemnid sp.	Electra pilosa	Morchellium argus	Membranipora membranacea	Molgula sp.	Mytilus sp.	Perforatus perforatus	Spirobranchus sp.	Spong esp.	Spirorbis sp.	Tricellaria inopinata	Verruca stroemia	Watersipora subatra		Grid	HW duration	Treatment	Treatement-rep	Phase	Treatment-phase	Panel
A1C1a3	3	0	0	0	0	0	48	0	0	0	15	0	0	0	0	8	0	0	0	52	0	100	0	0	0	0	0	153	0	0	0	0	0		A	1	C	C1	a	A-C-1-a	3
A1C1b3	2	0	0	0	0	0	50	0	0	0	22	0	0	5	0	10	2	0	0	77	0	121	0	0	0	0	0	240	0	0	0	0	0		A	1	C	C1	b	A-C-1-b	3
A1C1c3	6	0	0	0	0	0	31	0	0	0	65	0	0	7	0	62	9	0	0	106	1	61	0	0	0	0	0	78	1	0	5	0	0		A	1	C	C1	c	A-C-1-c	3
A1C2a31	10	0	0	0	0	0	48	0	0	0	11	0	0	8	0	1	0	0	0	63	0	83	0	0	0	0	0	238	0	0	0	0	0		A	1	C	C2	a	A-C-1-a	31
A1C2b31	10	0	0	0	5	0	52	0	0	0	19	0	0	16	0	2	2	0	0	84	0	111	0	0	0	0	0	316	0	0	0	0	0		A	1	C	C2	b	A-C-1-b	31
A1C2c31	33	0	4	0	0	0	64	0	0	0	50	0	0	24	0	6	10	0	0	116	1	43	0	0	0	0	0	111	0	0	2	0	0		A	1	C	C2	c	A-C-1-c	31
A1C3a7	10	0	0	0	0	0	114	0	0	0	18	0	0	6	0	2	0	0	0	49	0	87	0	0	0	0	0	182	0	0	0	0	0		A	1	C	C3	a	A-C-1-a	7
A1C3b7	7	0	0	0	3	0	113	0	0	0	27	0	0	15	0	1	2	0	0	69	3	92	0	0	0	0	0	250	0	0	0	0	0		A	1	C	C3	b	A-C-1-b	7
A1C3c7	10	0	0	0	0	0	121	0	0	0	51	0	0	10	0	25	0	0	0	117	0	60	0	0	4	0	0	39	0	0	5	0	0		A	1	C	C3	c	A-C-1-c	7
A1C4a13	4	0	0	0	3	0	92	0	0	0	17	0	0	4	0	3	0	0	0	68	0	100	0	0	0	0	0	170	0	0	0	0	0		A	1	C	C4	a	A-C-1-a	13
A1C4b13	7	0	0	0	5	0	74	0	0	0	29	0	0	13	0	7	1	0	0	79	0	110	0	0	0	0	0	223	0	0	0	0	1		A	1	C	C4	b	A-C-1-b	13
A1C4c13	34	0	3	0	0	0	75	0	0	0	62	0	0	22	0	29	1	0	0	110	0	35	0	0	0	1	0	77	0	0	6	0	0		A	1	C	C4	c	A-C-1-c	13
A1C5a9	5	0	0	0	0	0	25	0	0	0	11	0	0	3	0	28	3	0	0	76	0	115	0	0	0	0	0	552	0	0	0	0	0		A	1	C	C5	a	A-C-1-a	9
A1C5b9	5	0	0	0	3	0	20	0	0	0	12	0	0	16	0	43	4	0	0	71	0	121	0	0	0	1	0	447	0	0	0	0	0		A	1	C	C5	b	A-C-1-b	9
A1C5c9	13	0	5	0	0	0	26	0	0	0	39	0	0	29	0	129	3	0	0	105	0	60	0	0	0	0	0	104	0	0	2	0	0		A	1	C	C5	c	A-C-1-c	9
A1T1-1a35	5	0	0	0	0	0	70	0	0	0	10	0	0	5	0	5	0	0	0	88	0	118	0	0	0	0	0	318	0	0	0	0	0		A	1	T1	T1-1	a	A-T1-1-a	35
A1T1-1b35	4	0	0	0	0	0	61	0	0	0	18	0	0	9	0	7	2	0	0	93	0	111	0	0	0	0	0	282	0	0	0	0	0		A	1	T1	T1-1	b	A-T1-1-b	35
A1T1-1c35	15	0	0	0	0	0	53	0	0	0	57	0	0	16	0	44	2	0	0	111	1	57	0	0	0	0	0	55	0	0	4	0	0		A	1	T1	T1-1	c	A-T1-1-c	35
A1T1-2a2	8	0	0	0	0	0	20	0	0	0	14	0	0	3	0	8	1	0	0	81	0	119	0	0	0	0	0	452	0	0	0	0	0		A	1	T1	T1-2	a	A-T1-1-a	2
A1T1-2b2	11	0	0	0	3	0	14	0	0	0	16	0	0	9	0	21	4	0	0	59	0	120	0	0	0	0	0	438	0	0	0	0	0		A	1	T1	T1-2	b	A-T1-1-b	2
A1T1-2c2	57	0	4	0	2	0	6	2	0	0	47	0	0	14	0	75	10	0	0	119	2	50	0	0	1	2	0	156	0	0	3	0	0		A	1	T1	T1-2	c	A-T1-1-c	2
A1T1-3a22	10	0	0	0	0	0	78	0	0	0	7	0	0	9	0	18	0	0	0	90	0	118	0	0	0	0	0	199	0	0	0	0	0		A	1	T1	T1-3	a	A-T1-1-a	22
A1T1-3b22	6	0	0	0	0	0	74	0	0	0	9	0	0	8	0	33	0	0	0	77	0	121	0	0	0	1	0	209	0	0	0	0	0		A	1	T1	T1-3	b	A-T1-1-b	22
A1T1-3c22	40	0	12	0	0	1	32	0	0	1	33	0	0	6	0	113	0	0	1	112	0	96	0	0	0	0	0	69	0	0	1	0	0		A	1	T1	T1-3	c	A-T1-1-c	22
A1T1-4a34	4	0	0	0	0	0	94	0	0	0	11	0	0	7	0	5	0	0	0	67	0	119	0	0	0	0	0	322	0	0	0	0	0		A	1	T1	T1-4	a	A-T1-1-a	34
A1T1-4b34	4	0	0	0	0	0	84	0	0	0	23	0	0	11	0	7	0	0	0	84	0	120	0	0	0	3	0	306	0	0	0	0	0		A	1	T1	T1-4	b	A-T1-1-b	34
A1T1-4c34	40	0	1	0	0	0	86	0	0	0	44	0	0	22	0	16	2	0	0	119	0	62	0	0	0	1	0	101	0	0	4	0	0		A	1	T1	T1-4	c	A-T1-1-c	34
A1T1-5a36	4	0	0	0	0	0	84	0	0	0	2	0	0	3	0	3	1	0	0	69	0	111	0	0	0	0	0	245	0	0	0	0	0		A	1	T1	T1-5	a	A-T1-1-a	36
A1T1-5b36	5	0	0	0	0	0	88	0	0	0	10	0	0	9	0	4	0	0	0	98	1	120	0	0	0	0	0	281	0	0	0	0	0		A	1	T1	T1-5	b	A-T1-1-b	36
A1T1-5c36	25	0	0	0	0	0	77	0	0	0	36	0	0	20	0	23	2	0	0	115	0	61	0	0	2	0	0	56	0	0	2	0	0		A	1	T1	T1-5	c	A-T1-1-c	36
A1T2-1a32	6	0	0	0	0	0	91	0	0	0	8	0	0	1	0	1	0	0	0	76	0	100	0	0	0	0	0	141	0	0	0	0	0		A	1	T2	T2-1	a	A-T2-1-a	32
A1T2-1b32	4	0	0	0	0	0	63	0	0	0	10	0	0	3	0	2	3	0	0	121	0	119	0	0	0	0	0	179	0	0	0	0	0		A	1	T2	T2-1	b	A-T2-1-b	32
A1T2-1c32	27	4	0	0	0	0	82	0	0	0	35	0	0	4	0	2	7	0	0	120	2	98	0	0	0	0	0	42	0	0	1	0	0		A	1	T2	T2-1	c	A-T2-1-c	32
A1T2-2a24	20	0	0	0	0	0	59	0	0	0	9	0	0	3	0	11	4	0	0	92	0	121	0	0	0	1	0	408	0	0	0	0	1		A	1	T2	T2-2	a	A-T2-1-a	24
A1T2-2b24	9	0	0	0	0	0	50	0	0	0	12	0	0	12	0	21	6	0	0	79	0	110	0	0	0	0	0	343	0	0	0	0	0		A	1	T2	T2-2	b	A-T2-1-b	24
A1T2-2c24	44	0	3	0	0	2	15	6	0	0	27	0	0	15	0	80	5	0	0	114	1	75	0	0	1	2	0	60	0	0	0	0	0		A	1	T2	T2-2	c	A-T2-1-c	24
A1T2-3a21	5	0	0	0	0	0	56	0	0	0	10	0	0	3	0	3	0	0	0	80	0	120	0	0	0	0	0	233	0	0	0	0	0		A	1	T2	T2-3	a	A-T2-1-a	21
A1T2-3b21	6	0	0	0	1	0	48	0	0	0	11	0	0	2	0	36	1	0	0	88	0	110	0	0	0	0	0	189	0	0	0	0	0		A	1	T2	T2-3	b	A-T2-1-b	21
A1T2-3c21	38	0	0	0	0	0	31	4	0	0	27	0	0	14	0	146	3	0	0	115	0	57	0	0	0	0	0	49	0	0	1	0	0		A	1	T2	T2-3	c	A-T2-1-c	21
A1T2-4a23	13	0	0	0	0	0	94	0	0	0	6	0	0	2	0	41	0	0	0	82	0	118	0	0	0	1	0	208	0	0	0	0	0		A	1	T2	T2-4	a	A-T2-1-a	23
A1T2-4b23	10	0	0	0	0	0	66	0	0	0	14	0	0	3	0	49	1	0	0	98	0	121	0	0	0	5	0	148	0	0	0	0	0		A	1	T2	T2-4	b	A-T2-1-b	23
A1T2-4c23	51	0	0	0	0	0	30	0	0	0	25	0	0	4	0	167	12	0	0	100	0	46	0	0	2	1	0	23	0	0	0	0	0		A	1	T2	T2-4	c	A-T2-1-c	23
A1T2-5a19	6	0	0	0	1	0	137	0	0	0	15	0	0	4	0	13	1	0	0	86	0	101	0	0	0	0	0	289	0	0	1	0	0		A	1	T2	T2-5	a	A-T2-1-a	19
A1T2-5b19	4	0	0	0	4	0	113	0	0	0	20	0	0	7	0	10	1	0	0	105	0	107	0	0	0	1	0	247	0	0	0	0	0		A	1	T2	T2-5	b	A-T2-1-b	19
A1T2-5c19	35	0	1	0	0	0	129	0	0	0	44	0	0	28	0	27	3	0	0	119	0	53	1	0	1	0	0	82	0	0	5	0	0		A	1	T2	T2-5	c	A-T2-1-c	19
A2C1a4	1	0	0	0	3	0	3	0	0	0	6	0	0	1	0	8	0	0	0	59	0	59	0	0	0	0	0	152	0	0	0	0	1		A	2	C	C1	a	A-C-2-a	4
A2C1b4	6	0	0	0	4	0	5	0	0	0	12	0	0	4	0	20	3	0	0	97	0	120	0	0	0	1	0	294	0	0	0	0	0		A	2	C	C1	b	A-C-2-b	4
A2C1c4	7	0	0	0	0	0	7	0	0	1	30	0	0	13	0	63	1	0	0	117	2	95	0	0	0	1	0	282	0	0	18	0	1		A	2	C	C1	c	A-C-2-c	4
A2C2a18	8	0	0	0	0	0	35	0	0	0	10	0	0	2	0	4	0	0	0	75	2	121	0	0	0	0	0	457	0	0	0	0	0		A	2	C	C2	a	A-C-2-a	18
A2C2b18	11	0	0	0	0	0	34	1	0	0	24	0	0	10	0	14	1	0	0	79	0	99	0	0	0	2	0	431	0	0	0	0	0		A	2	C	C2	b	A-C-2-b	18
A2C2c18	11	0	0	0	0	0	16	2	0	0	39	0	0	14	0	34	4	0	0	119	0	81	0	0	5	1	0	381	0	0	9	0	0		A	2	C	C2	c	A-C-2-c	18
A2C3a10	8	0	0	0	0	0	19	0	0	0	12	0	0	5	0	33	0	0	0	51	0	100	0	0	0	0	0	245	0	0	0	0	0		A	2	C	C3	a	A-C-2-a	10
A2C3b10	24	0	0	0	1	0	20	0	0	0	20	0	0	0	0	87	3	0	0	63	0	116	0	0	0	0	0	480	0	0	0	0	0		A	2	C	C3	b	A-C-2-b	10
A2C3c10	49	0	0	0	0	0	18	0	0	0	48	5	0	11	0	147	1	0	0	99	1	92	0	0	0	1	0	286	0	0	5	0	0		A	2	C	C3	c	A-C-2-c	10
A2C4a17	10	0	0	0	0	0	24	0	0	0	9	0	0	2	0	20	1	0	0	58	0	121	0	0	0	0	0	595	0	0	0	0	0		A	2	C	C4	a	A-C-2-a	17
A2C4b17	20	0	0	0	1	0	41	0	0	0	18	0	0	5	0	52	5	0	0	92	0	121	0	0	0	0	0	695	0	0	0	0	0		A	2	C	C4	b	A-C-2-b	17
A2C4c17	46	0	0	0	0	0	15	0	0	0	24	0	0	14	0	102	6	0	0	106	0	76	0	0	0	0	0	426	0	0	7	0	0		A	2	C	C4	c	A-C-2-c	17
A2C5a29	7	0	0	0	0	0	61	0	0	0	8	0	0	4	0	14	0	0	0	41	0	100	0	0	0	0	0	165	0	0	0	0	0		A	2	C	C5	a	A-C-2-a	29
A2C5b29	20	0	0	0	0	0	90	0	0	0	11	0	0	8	0	36	0	0	0	74	0	121	0	0	0	0	0	393	0	0	1	0	0		A	2	C	C5	b	A-C-2-b	29
A2C5c29	29	0	1	0	0	0	60	0	0	0	33	10	0	17	0	53	2	0	0	115	1	107	0	0	1	1	0	277	0	0	14	0	0		A	2	C	C5	c	A-C-2-c	29
A2T1-1a11	8	0	0	0	0	0	59	0	0	0	8	0	0	3	0	21	1	0	0	69	0	118	0	0	0	0	0	295	0	0	0	0	0		A	2	T1	T1-1	a	A-T1-2-a	11
A2T1-1b11	16	0	0	0	1	0	48	0	0	0	13	0	0	2	0	6	6	0	0	60	1	120	0	0	0	0	0	382	0	0	0	0	0		A	2	T1	T1-1	b	A-T1-2-b	11
A2T1-1c11	42	0	0	0	0	0	12	3	0	0	39	2	0	9	0	95	4	0	0	115	2	100	1	0	7	1	0	364	0	0	14	0	0		A	2	T1	T1-1	c	A-T1-2-c	11
A2T1-2a16	14	0	1	0	1	0	19	0	3	0	10	0	0	7	0	34	0	0	0	68	0	121	0	0	0	0	0	235	0	0	0	0	0		A	2	T1	T1-2	a	A-T1-2-a	16
A2T1-2b16	32	0	1	0	1	0	27	0	0	0	20	0	0	8	0	101	2	0	0	86	0	121	0	0	0	0	0	344	0	0	0	0	0		A	2	T1	T1-2	b	A-T1-2-b	16
A2T1-2c16	36	0	2	4	0	1	9	0	0	0	31	0	0	17	0	147	3	0	0	109	2	84	0	0	1	0	0	207	0	0	4	0	0		A	2	T1	T1-2	c	A-T1-2-c	16
A2T1-3a27	3	0	0	0	0	0	54	0	0	0	10	0	0	2	0	24	0	0	0	65	0	100	0	0	0	0	0	267	0	0	0	0	0		A	2	T1	T1-3	a	A-T1-2-a	27
A2T1-3b27	10	0	0	0	1	0	51	0	0	0	27	0	0	14	0	44	4	0	0	61	0	121	0	0	0	2	0	333	0	0	0	0	0		A	2	T1	T1-3	b	A-T1-2-b	27
A2T1-3c27	39	0	0	0	0	0	26	0	0	0	41	0	0	10	0	86	5	0	0	112	0	49	0	0	2	0	0	246	0	0	1	0	0		A	2	T1	T1-3	c	A-T1-2-c	27
A2T1-4a14	5	0	0	0	1	0	44	1	0	0	18	0	0	5	0	3	0	0	0	87	0	115	0	0	0	1	0	364	0	1	0	0	0		A	2	T1	T1-4	a	A-T1-2-a	14
A2T1-4b14	11	0	4	1	2	0	45	2	0	0	21	0	0	12	0	67	2	0	0	84	0	115	0	0	0	0	0	383	0	0	0	0	0		A	2	T1	T1-4	b	A-T1-2-b	14
A2T1-4c14	9	0	3	0	0	0	43	3	0	0	39	0	0	24	0	75	1	0	0	121	1	76	0	0	2	0	0	166	0	0	3	0	0		A	2	T1	T1-4	c	A-T1-2-c	14
A2T1-5a8	7	0	0	0	2	0	72	0	0	0	12	0	0	3	0	11	1	0	0	62	0	108	0	0	0	0	0	339	0	0	0	0	11		A	2	T1	T1-5	a	A-T1-2-a	8
A2T1-5b8	11	0	1	0	6	0	71	0	0	0	14	0	0	11	0	26	2	0	0	98	0	109	0	0	0	0	0	429	0	0	2	0	2		A	2	T1	T1-5	b	A-T1-2-b	8
A2T1-5c8	27	0	0	0	1	0	29	2	0	0	26	0	0	34	0	23	5	0	0	121	2	51	0	0	0	0	0	247	0	0	7	0	0		A	2	T1	T1-5	c	A-T1-2-c	8
A2T2-1a12	6	0	1	0	0	0	13	0	0	0	15	0	0	0	0	7	1	0	0	38	0	121	0	0	0	0	0	21	0	0	0	0	0		A	2	T2	T2-1	a	A-T2-2-a	12
A2T2-1b12	1	0	0	0	0	0	9	0	0	0	16	0	0	6	0	11	6	0	0	69	0	110	0	0	0	0	0	455	0	0	0	0	0		A	2	T2	T2-1	b	A-T2-2-b	12
A2T2-1c12	28	0	0	0	0	0	8	1	0	1	46	0	0	5	0	25	3	0	0	119	0	71	0	0	0	0	0	375	0	0	14	0	0		A	2	T2	T2-1	c	A-T2-2-c	12
A2T2-2a5	3	0	0	0	3	0	13	0	0	0	16	0	0	8	0	2	0	0	0	76	0	100	0	0	0	0	0	237	0	0	0	0	0		A	2	T2	T2-2	a	A-T2-2-a	5
A2T2-2b5	6	0	0	0	5	0	6	0	0	0	37	0	0	21	0	9	1	0	0	51	1	120	0	0	0	1	0	355	0	0	4	0	1		A	2	T2	T2-2	b	A-T2-2-b	5
A2T2-2c5	18	0	1	0	1	0	7	0	0	1	68	0	0	23	0	51	2	0	1	107	6	100	0	0	0	0	0	441	0	0	20	0	2		A	2	T2	T2-2	c	A-T2-2-c	5
A2T2-3a25	7	0	0	0	0	0	348	0	0	0	8	0	0	4	0	1	0	0	0	60	0	114	0	0	0	0	0	163	0	0	0	0	0		A	2	T2	T2-3	a	A-T2-2-a	25
A2T2-3b25	8	0	0	0	1	0	281	0	0	0	17	0	0	13	0	0	1	0	0	62	1	115	0	0	0	1	0	228	0	0	2	0	0		A	2	T2	T2-3	b	A-T2-2-b	25
A2T2-3c25	20	0	0	0	0	0	254	1	0	1	27	0	0	17	0	5	5	0	0	120	1	42	0	0	2	0	0	146	0	0	10	0	0		A	2	T2	T2-3	c	A-T2-2-c	25
A2T2-4a26	6	0	0	0	0	0	170	0	0	0	8	0	0	4	0	10	0	0	0	49	2	100	0	0	0	0	0	152	0	0	0	0	0		A	2	T2	T2-4	a	A-T2-2-a	26
A2T2-4b26	11	0	0	0	4	0	222	0	0	0	19	0	0	3	0	31	2	0	0	63	0	121	0	0	0	3	0	378	0	0	1	0	1		A	2	T2	T2-4	b	A-T2-2-b	26
A2T2-4c26	28	0	0	0	0	0	41	0	0	0	41	0	0	11	0	53	0	0	0	108	1	77	0	0	1	0	0	354	0	0	6	0	0		A	2	T2	T2-4	c	A-T2-2-c	26
A2T2-5a28	6	0	0	0	0	0	75	0	0	0	11	0	0	2	0	15	0	0	0	34	0	100	0	0	0	0	0	315	0	0	0	0	0		A	2	T2	T2-5	a	A-T2-2-a	28
A2T2-5b28	13	0	1	0	0	0	104	0	0	0	23	0	0	3	0	52	3	0	0	28	0	121	0	0	1	4	0	368	0	0	0	0	0		A	2	T2	T2-5	b	A-T2-2-b	28
A2T2-5c28	25	0	0	0	0	0	49	1	0	0	37	0	0	6	0	74	4	0	0	90	0	89	0	0	0	2	0	372	0	0	11	0	0		A	2	T2	T2-5	c	A-T2-2-c	28
A3FC31	24	0	3	0	0	0	155	0	0	0	50	0	0	29	0	15	3	0	0	121	1	41	0	0	1	2	0	104	0	0	9	0	0		A	3	FC	FC	3	A-FC-3-3	1
A3FC36	52	0	1	0	0	0	19	0	0	0	39	0	0	12	0	16	2	0	0	115	0	68	0	0	0	0	0	47	0	0	9	0	0		A	3	FC	FC	3	A-FC-3-3	6
A3FC315	32	0	1	0	0	0	6	0	0	0	47	0	0	10	0	112	9	0	0	103	0	76	0	0	0	0	0	45	0	0	0	0	0		A	3	FC	FC	3	A-FC-3-3	15
A3FC320	29	0	0	0	0	0	42	0	0	0	34	2	0	9	0	84	2	0	0	105	0	76	0	0	0	0	0	21	0	0	3	0	0		A	3	FC	FC	3	A-FC-3-3	20
A3FC330	31	0	0	0	0	0	11	0	0	0	29	0	0	13	0	36	3	0	0	113	1	100	0	0	0	0	0	53	0	0	0	0	0		A	3	FC	FC	3	A-FC-3-3	30
A3FC333	32	0	0	0	0	0	51	0	0	0	27	0	0	16	0	4	9	0	0	121	2	107	0	0	0	2	0	40	0	0	13	0	0		A	3	FC	FC	3	A-FC-3-3	33
B1C1a2	16	0	8	0	4	0	0	0	0	0	26	1	0	7	4	13	5	0	0	107	2	7	1	0	0	0	0	298	2	0	8	0	0		B	1	C	C1	a	B-C-1-a	2
B1C1b2	28	0	11	2	7	0	0	0	0	0	25	0	0	19	4	32	13	0	2	103	2	7	2	0	2	0	0	327	3	0	13	0	0		B	1	C	C1	b	B-C-1-b	2
B1C1c2	40	0	6	9	5	0	9	0	0	2	47	0	0	18	0	55	9	0	0	118	1	5	0	0	4	0	0	227	0	0	19	0	0		B	1	C	C1	c	B-C-1-c	2
B1C2a31	2	0	4	0	5	0	1	0	0	0	40	0	0	1	0	0	3	0	1	33	0	1	0	0	0	0	0	179	20	0	10	0	0		B	1	C	C2	a	B-C-1-a	31
B1C2b31	3	0	4	0	7	0	1	0	0	0	50	0	0	3	0	0	3	0	2	25	4	0	0	0	0	0	0	228	11	0	13	0	0		B	1	C	C2	b	B-C-1-b	31
B1C2c31	17	0	9	0	7	0	23	0	0	8	105	1	0	10	0	13	6	4	0	118	0	0	0	0	3	0	0	261	0	0	27	0	0		B	1	C	C2	c	B-C-1-c	31
B1C3a34	14	0	11	1	2	2	0	0	0	0	40	0	2	25	1	76	10	0	2	72	1	4	2	0	3	0	0	239	15	0	8	0	1		B	1	C	C3	a	B-C-1-a	34
B1C3b34	20	0	12	0	4	2	0	0	0	0	53	2	3	29	2	84	16	0	3	81	1	6	2	0	9	0	0	284	7	0	14	0	1		B	1	C	C3	b	B-C-1-b	34
B1c34	59	0	4	25	2	0	8	1	0	1	58	0	1	42	0	159	10	0	0	109	1	4	3	0	10	0	0	204	0	0	29	0	2		B	1	C	C3	c	B-C-1-c	34
B1C4a19	4	0	11	0	1	0	0	0	2	0	29	0	1	9	0	2	7	3	2	56	0	0	0	0	0	2	0	84	23	0	7	0	0		B	1	C	C4	a	B-C-1-a	19
B1C4b19	5	0	7	0	0	0	0	0	0	0	39	0	1	18	0	2	15	4	3	49	0	2	0	0	2	0	0	116	3	0	14	0	0		B	1	C	C4	b	B-C-1-b	19
B1C4c19	21	0	8	0	1	0	35	0	0	4	52	0	1	31	0	9	29	6	3	112	3	2	0	0	4	0	0	133	1	0	26	0	0		B	1	C	C4	c	B-C-1-c	19
B1C5a7	15	0	13	2	10	0	0	0	0	0	13	0	2	10	0	1	12	2	1	96	0	0	0	0	2	4	0	217	7	0	11	0	1		B	1	C	C5	a	B-C-1-a	7
B1C5b7	17	0	10	11	15	0	0	0	0	0	21	0	5	19	0	2	23	2	1	103	0	0	0	0	6	3	0	284	5	0	14	0	1		B	1	C	C5	b	B-C-1-b	7
B1C5c7	72	0	0	0	0	0	0	0	0	6	74	0	0	59	0	17	80	5	0	115	1	0	0	0	14	0	0	365	0	0	65	0	0		B	1	C	C5	c	B-C-1-c	7
B1T1-1a12	21	0	0	0	0	0	0	0	0	0	9	0	0	13	0	58	10	0	0	115	0	6	0	0	0	0	0	216	3	0	5	0	0		B	1	T1	T1-1	a	B-T1-1-a	12
B1T1-1b12	24	0	6	1	9	0	0	0	0	0	22	10	1	14	0	88	27	0	2	111	1	9	0	0	5	7	0	271	5	0	10	0	1		B	1	T1	T1-1	b	B-T1-1-b	12
B1T1-1c12	28	0	4	43	1	0	1	0	0	0	23	0	0	25	0	92	34	0	0	114	0	10	0	0	7	0	0	153	0	0	14	0	0		B	1	T1	T1-1	c	B-T1-1-c	12
B1T1-2a36	18	0	5	1	3	0	0	0	0	0	50	0	3	14	0	29	14	2	1	109	0	13	1	0	3	1	0	120	1	0	9	0	0		B	1	T1	T1-2	a	B-T1-1-a	36
B1T1-2b36	22	0	13	5	4	0	0	0	0	0	59	1	5	18	1	56	22	0	1	88	3	17	1	0	8	0	0	151	0	0	14	0	0		B	1	T1	T1-2	b	B-T1-1-b	36
B1T1-2c36	35	0	5	13	4	0	12	1	0	5	54	1	0	35	0	52	18	7	0	99	4	11	0	0	1	0	0	113	0	0	21	0	0		B	1	T1	T1-2	c	B-T1-1-c	36
B1T1-3a26	24	0	13	9	3	0	2	1	0	0	18	2	2	32	0	43	9	0	2	55	1	0	1	0	0	2	0	302	12	0	13	1	0		B	1	T1	T1-3	a	B-T1-1-a	26
B1T1-3b26	41	0	14	6	4	0	1	0	0	0	20	7	3	39	0	69	12	0	2	50	1	0	1	0	11	1	0	367	8	1	17	1	0		B	1	T1	T1-3	b	B-T1-1-b	26
B1T1-3c26	82	0	9	4	1	0	7	1	0	0	42	0	1	60	0	128	7	0	1	96	0	0	0	0	20	0	0	275	0	0	25	0	0		B	1	T1	T1-3	c	B-T1-1-c	26
B1T1-4a8	26	0	8	0	4	0	0	0	0	2	29	0	2	16	0	58	17	3	0	83	2	22	0	0	0	0	0	130	20	0	8	0	0		B	1	T1	T1-4	a	B-T1-1-a	8
B1T1-4b8	35	0	6	0	7	0	0	1	0	1	34	0	2	17	0	53	22	4	0	81	0	27	0	0	2	0	0	172	11	0	8	0	0		B	1	T1	T1-4	b	B-T1-1-b	8
B1T1-4c8	59	0	5	0	2	0	3	8	0	7	33	0	1	25	0	99	49	1	0	116	0	13	0	0	2	0	0	142	0	0	22	0	0		B	1	T1	T1-4	c	B-T1-1-c	8
B1T1-5a10	17	0	9	0	3	1	0	0	0	0	29	0	2	1	0	61	21	2	0	72	2	3	2	0	3	1	0	272	2	0	1	0	0		B	1	T1	T1-5	a	B-T1-1-a	10
B1T1-5b10	21	0	7	0	3	0	0	0	0	0	29	0	2	3	0	77	39	3	0	47	0	2	3	0	5	0	0	299	1	0	3	0	0		B	1	T1	T1-5	b	B-T1-1-b	10
B1T1-5c10	41	0	0	0	0	0	8	0	0	4	27	0	0	4	0	123	72	0	0	109	0	1	0	0	0	0	0	221	1	0	15	0	0		B	1	T1	T1-5	c	B-T1-1-c	10
B1T2-1a35	29	0	4	0	6	0	0	0	0	0	23	1	0	4	0	83	16	4	0	85	0	3	0	0	1	0	0	282	14	0	5	0	0		B	1	T2	T2-1	a	B-T2-1-a	35
B1T2-1b35	26	0	4	0	8	0	0	0	0	0	31	4	0	9	0	112	16	4	3	86	0	5	0	0	13	2	0	398	4	0	8	0	1		B	1	T2	T2-1	b	B-T2-1-b	35
B1T2-1c35	49	0	3	0	0	0	2	0	0	4	41	0	0	12	0	204	15	9	0	102	0	3	0	0	13	0	0	241	0	10	15	0	0		B	1	T2	T2-1	c	B-T2-1-c	35
B1T2-2a27	17	0	16	1	11	1	0	3	0	0	10	1	6	18	0	20	12	5	3	81	0	1	0	0	1	2	0	266	1	0	8	0	0		B	1	T2	T2-2	a	B-T2-1-a	27
B1T2-2b27	22	0	13	2	9	2	0	1	0	0	10	1	7	14	0	35	14	3	3	51	2	2	1	0	16	1	0	376	0	0	19	0	0		B	1	T2	T2-2	b	B-T2-1-b	27
B1T2-2c27	62	0	6	6	3	0	10	5	0	4	7	1	0	25	0	53	14	0	1	107	0	1	0	0	7	0	0	313	0	0	38	0	0		B	1	T2	T2-2	c	B-T2-1-c	27
B1T2-3a17	18	0	3	1	4	0	0	1	0	0	20	1	1	15	0	80	7	0	0	105	1	4	1	4	0	1	0	240	4	0	10	0	5		B	1	T2	T2-3	a	B-T2-1-a	17
B1T2-3b17	22	0	5	0	8	0	0	2	0	0	19	5	3	18	0	121	12	4	1	96	0	5	1	0	2	2	0	299	1	0	11	0	3		B	1	T2	T2-3	b	B-T2-1-b	17
B1T2-3c17	45	0	0	0	2	0	4	4	0	2	17	0	0	18	0	195	3	7	0	109	0	0	0	0	1	0	0	190	0	0	19	0	0		B	1	T2	T2-3	c	B-T2-1-c	17
B1T2-4a24	21	0	4	2	8	1	0	0	0	0	17	2	1	16	0	54	11	3	1	109	1	0	1	0	4	1	0	295	2	0	7	0	0		B	1	T2	T2-4	a	B-T2-1-a	24
B1T2-4b24	23	0	4	0	8	0	0	0	0	0	22	2	2	18	0	81	16	4	1	88	0	1	1	0	12	0	0	0	0	0	11	0	0		B	1	T2	T2-4	b	B-T2-1-b	24
B1T2-4c24	42	0	3	0	3	0	2	2	0	3	23	0	1	26	0	111	19	1	2	116	0	0	0	0	12	0	0	252	0	0	16	0	0		B	1	T2	T2-4	c	B-T2-1-c	24
B1T2-5a18	24	0	6	0	0	0	0	0	0	0	30	0	0	8	0	52	9	0	0	116	3	1	0	0	0	1	0	254	0	0	7	1	0		B	1	T2	T2-5	a	B-T2-1-a	18
B1T2-5b18	25	0	13	0	1	1	0	0	0	0	35	0	0	10	0	97	12	0	0	103	0	3	0	0	6	1	0	291	0	0	9	0	0		B	1	T2	T2-5	b	B-T2-1-b	18
B1T2-5c18	70	0	0	0	0	0	0	0	0	1	25	0	0	21	0	115	13	0	0	103	0	0	0	0	9	0	0	78	0	0	22	0	0		B	1	T2	T2-5	c	B-T2-1-c	18
B2C1a3	36	0	6	0	5	0	0	0	0	0	29	0	1	6	0	40	7	4	0	97	1	3	2	0	1	3	0	286	6	0	4	0	1		B	2	C	C1	a	B-C-2-a	3
B2C1b3	45	0	6	14	4	0	0	2	0	0	34	2	1	8	0	70	12	5	1	55	0	6	4	0	27	2	0	391	3	0	12	0	2		B	2	C	C1	b	B-C-2-b	3
B2C1c3	72	0	3	31	3	0	0	4	0	2	35	0	1	7	0	92	8	11	0	78	0	4	1	0	12	0	0	338	0	0	16	0	1		B	2	C	C1	c	B-C-2-c	3
B2C2a32	0	0	4	0	5	1	0	0	0	0	37	0	3	11	0	3	4	2	0	47	1	2	0	0	0	1	0	188	20	0	11	0	1		B	2	C	C2	a	B-C-2-a	32
B2C2b32	12	0	4	0	4	1	0	0	0	1	49	0	3	12	0	6	8	4	0	16	0	4	0	0	21	0	0	268	3	0	13	0	1		B	2	C	C2	b	B-C-2-b	32
B2C2c32	39	0	1	13	1	0	2	2	0	4	25	0	0	10	0	284	18	9	1	72	0	0	0	0	24	0	0	353	0	0	43	0	0		B	2	C	C2	c	B-C-2-c	32
B2C3a33	11	0	7	0	4	0	0	0	0	0	28	1	3	17	0	18	9	3	0	81	1	1	0	0	2	2	0	282	6	0	8	0	0		B	2	C	C3	a	B-C-2-a	33
B2C3b33	20	0	7	0	3	0	0	0	0	0	43	7	1	32	0	44	12	6	1	39	0	0	0	0	9	3	0	250	1	1	24	0	3		B	2	C	C3	b	B-C-2-b	33
B2C3c33	33	0	0	0	2	0	0	4	0	6	54	0	0	34	0	64	10	6	1	96	0	0	0	0	1	0	0	272	0	0	43	0	0		B	2	C	C3	c	B-C-2-c	33
B2C4a21	35	0	15	0	5	0	0	1	0	0	24	0	3	8	0	40	4	3	1	92	0	2	0	0	4	3	0	266	0	0	8	0	0		B	2	C	C4	a	B-C-2-a	21
B2C4b21	32	0	12	1	7	0	0	0	0	0	34	12	8	15	0	53	6	4	2	54	1	0	0	0	25	1	0	251	1	0	10	0	0		B	2	C	C4	b	B-C-2-b	21
B2C4c21	61	0	23	4	1	0	0	3	0	9	35	0	5	8	0	99	3	14	0	85	1	8	0	0	21	0	0	250	0	0	18	0	0		B	2	C	C4	c	B-C-2-c	21
B2C5a13	11	0	12	3	1	0	1	0	0	0	33	0	5	8	0	3	12	0	2	79	1	19	0	0	1	0	0	111	8	0	12	0	0		B	2	C	C5	a	B-C-2-a	13
B2C5b13	11	0	11	7	0	1	0	0	0	0	42	0	1	11	0	6	17	0	1	73	0	26	0	0	15	0	0	131	2	0	17	0	0		B	2	C	C5	b	B-C-2-b	13
B2C5c13	23	0	16	29	0	0	0	0	0	7	44	0	0	10	0	12	27	14	1	110	1	21	0	0	13	0	0	147	0	0	40	0	0		B	2	C	C5	c	B-C-2-c	13
B2T1-1a6	10	0	8	0	5	0	0	1	0	0	27	1	1	5	0	53	19	4	0	81	1	0	0	0	1	0	0	318	4	1	11	0	0		B	2	T1	T1-1	a	B-T1-2-a	6
B2T1-1b6	15	0	3	0	4	0	0	5	0	4	35	0	2	8	0	89	25	7	1	71	0	0	0	0	21	3	0	462	0	0	15	0	0		B	2	T1	T1-1	b	B-T1-2-b	6
B2T1-1c6	13	0	0	0	3	0	2	20	0	13	43	0	0	14	0	155	17	17	0	108	0	0	0	0	15	0	0	414	0	0	26	0	0		B	2	T1	T1-1	c	B-T1-2-c	6
B2T1-2a35	32	0	19	0	9	0	0	0	0	0	35	0	3	11	0	3	11	2	1	65	0	1	1	0	4	2	0	389	0	0	12	0	0		B	2	T1	T1-2	a	B-T1-2-a	35
B2T1-2b35	25	0	6	0	12	0	0	0	0	0	40	5	5	13	0	37	18	3	1	31	0	0	0	0	4	0	0	455	2	0	18	0	0		B	2	T1	T1-2	b	B-T1-2-b	35
B2T1-2c35	60	0	0	0	8	0	2	2	0	14	44	9	0	34	0	50	18	9	1	60	0	0	0	0	6	0	0	549	1	0	35	0	0		B	2	T1	T1-2	c	B-T1-2-c	35
B2T1-3a25	14	0	9	0	8	0	4	0	0	0	31	0	2	19	1	14	12	0	1	64	0	0	0	0	3	1	0	125	12	0	4	0	0		B	2	T1	T1-3	a	B-T1-2-a	25
B2T1-3b25	16	0	8	0	10	2	2	2	0	0	35	2	3	26	0	30	51	0	1	33	0	0	0	0	23	1	0	190	3	0	6	0	0		B	2	T1	T1-3	b	B-T1-2-b	25
B2T1-3c25	46	0	0	0	8	0	2	4	0	3	32	0	3	40	0	43	70	0	2	82	1	0	0	0	37	0	0	227	0	0	16	0	0		B	2	T1	T1-3	c	B-T1-2-c	25
B2T1-4a14	12	0	11	0	4	1	1	0	0	0	31	0	0	18	0	21	5	0	1	99	1	5	0	0	1	3	0	188	11	0	5	0	0		B	2	T1	T1-4	a	B-T1-2-a	14
B2T1-4b14	13	0	12	0	5	2	0	0	1	0	33	0	3	15	0	41	14	0	1	93	0	6	0	0	11	0	0	225	7	0	8	0	2		B	2	T1	T1-4	b	B-T1-2-b	14
B2T1-4c14	39	0	6	0	3	0	0	3	1	2	45	0	0	25	0	55	14	0	0	115	0	5	0	0	9	0	0	179	0	1	22	0	0		B	2	T1	T1-4	c	B-T1-2-c	14
B2T1-5a9	23	0	3	0	2	0	0	0	0	0	34	2	1	2	0	79	15	0	0	89	6	1	0	0	0	3	0	310	1	0	5	0	1		B	2	T1	T1-5	a	B-T1-2-a	9
B2T1-5b9	19	0	1	0	2	0	0	0	0	0	43	0	3	3	0	80	19	0	0	61	0	2	0	0	5	0	0	402	0	0	10	0	1		B	2	T1	T1-5	b	B-T1-2-b	9
B2T1-5c9	42	0	0	0	3	0	2	1	0	8	44	0	1	1	0	90	23	0	0	106	5	1	0	0	2	0	0	408	0	0	11	0	0		B	2	T1	T1-5	c	B-T1-2-c	9
B2T2-1a34	28	0	11	1	8	2	0	1	0	0	17	0	1	5	0	78	16	2	0	91	2	0	0	0	0	1	0	324	5	0	13	0	2		B	2	T2	T2-1	a	B-T2-2-a	34
B2T2-1b34	36	0	13	9	10	2	0	4	0	0	21	3	1	6	0	30	30	5	2	71	0	0	0	0	9	1	0	436	0	0	21	0	2		B	2	T2	T2-1	b	B-T2-2-b	34
B2T2-1c34	59	0	4	25	2	0	8	1	0	1	58	0	1	42	0	159	10	0	0	109	1	4	3	0	10	0	0	204	0	0	29	0	2		B	2	T2	T2-1	c	B-T2-2-c	34
B2T2-2a29	36	0	13	0	10	0	0	0	0	0	35	0	3	21	0	124	17	0	0	97	2	0	1	0	3	2	0	232	1	0	14	0	1		B	2	T2	T2-2	a	B-T2-2-a	29
B2T2-2b29	29	0	11	0	12	0	0	0	0	0	40	0	2	11	0	159	32	0	0	46	0	1	0	0	15	2	0	258	0	0	24	0	1		B	2	T2	T2-2	b	B-T2-2-b	29
B2T2-2c29	59	0	4	0	4	0	0	0	0	2	36	0	0	7	0	248	21	0	0	51	0	0	0	0	20	0	0	160	0	0	28	0	0		B	2	T2	T2-2	c	B-T2-2-c	29
B2T2-3a23	29	0	13	0	7	0	0	1	0	0	17	8	3	17	0	143	13	3	5	73	1	0	2	0	12	0	0	358	9	0	16	0	0		B	2	T2	T2-3	a	B-T2-2-a	23
B2T2-3b23	19	0	8	1	7	0	0	0	0	1	26	15	3	17	0	141	15	5	0	63	3	0	1	0	19	0	0	316	0	0	26	0	0		B	2	T2	T2-3	b	B-T2-2-b	23
B2T2-3c23	35	0	1	10	2	0	0	1	0	3	28	0	0	6	1	261	14	8	2	72	0	0	0	0	26	0	0	326	0	0	46	0	0		B	2	T2	T2-3	c	B-T2-2-c	23
B2T2-4a22	34	0	9	1	9	0	0	1	0	0	33	0	4	9	0	109	12	6	2	87	2	0	1	0	3	1	0	435	3	0	9	0	1		B	2	T2	T2-4	a	B-T2-2-a	22
B2T2-4b22	27	0	12	0	9	0	0	2	0	1	39	0	3	13	0	147	40	9	4	69	0	0	1	0	14	0	0	509	3	0	17	0	0		B	2	T2	T2-4	b	B-T2-2-b	22
B2T2-4c22	52	0	0	0	5	0	0	3	0	6	39	0	0	19	0	186	43	7	2	72	1	0	0	0	2	0	0	447	0	0	26	0	0		B	2	T2	T2-4	c	B-T2-2-c	22
B2T2-5a16	31	0	15	0	4	1	0	1	0	0	24	1	0	25	1	56	16	0	0	103	6	0	1	0	5	1	0	339	2	0	14	0	0		B	2	T2	T2-5	a	B-T2-2-a	16
B2T2-5b16	27	0	3	0	5	1	0	5	0	0	26	2	5	34	1	70	21	0	0	88	0	0	0	0	20	0	0	343	0	0	22	0	0		B	2	T2	T2-5	b	B-T2-2-b	16
B2T2-5c16	71	0	3	0	4	0	0	4	0	1	30	0	0	52	0	123	15	0	0	98	0	0	0	0	36	0	0	269	0	0	30	0	0		B	2	T2	T2-5	c	B-T2-2-c	16
B3FC31	81	0	0	0	0	0	2	1	0	5	55	0	1	36	1	7	42	0	1	102	0	0	0	0	6	0	0	44	0	0	22	0	0		B	3	FC	FC	3	B-FC-3-3	1
B3FC34	47	0	5	28	1	2	0	0	0	10	24	0	0	8	0	45	32	9	0	99	0	0	0	0	9	0	0	394	0	0	27	0	1		B	3	FC	FC	3	B-FC-3-3	4
B3FC311	92	0	6	0	0	0	0	0	0	5	58	0	0	14	0	183	16	0	0	97	0	0	1	0	6	0	0	66	0	0	18	0	0		B	3	FC	FC	3	B-FC-3-3	11
B3FC315	108	0	2	0	0	0	0	0	0	1	20	0	0	22	0	71	18	0	0	100	0	0	0	0	6	0	0	66	0	16	16	0	0		B	3	FC	FC	3	B-FC-3-3	15
B3FC320	57	0	12	0	0	0	1	0	0	0	58	0	0	27	0	7	35	0	0	115	0	0	0	0	12	0	0	123	0	2	16	0	1		B	3	FC	FC	3	B-FC-3-3	20
B3FC330	79	0	11	0	0	0	0	0	0	9	59	0	0	35	0	120	9	0	0	95	0	0	0	0	0	0	0	161	0	0	6	0	0		B	3	FC	FC	3	B-FC-3-3	30
B3FC328	98	0	11	0	1	0	0	2	0	2	56	0	0	24	0	134	11	2	0	96	0	0	0	0	5	0	0	79	0	0	4	0	0		B	3	FC	FC	3	B-FC-3-3	28
C1C1a20	4	0	3	0	0	2	5	0	0	5	38	28	0	11	1	8	9	0	10	63	0	10	0	0	2	1	0	38	11	0	28	0	3		C	1	C	C1	a	C-C-1-a	20
C1C1b20	3	0	4	0	1	2	4	0	0	13	50	15	0	16	0	10	28	0	27	75	0	14	0	0	13	0	0	52	3	8	26	0	2		C	1	C	C1	b	C-C-1-b	20
C1C1c20	2	0	4	0	0	2	2	0	0	31	59	20	0	29	0	4	9	0	13	86	0	10	0	0	0	0	1	58	0	0	68	0	4		C	1	C	C1	c	C-C-1-c	20
C1C2a17	0	0	6	0	0	1	3	0	0	0	12	11	1	4	0	1	7	0	16	58	0	0	0	0	0	0	0	44	8	0	18	0	7		C	1	C	C2	a	C-C-1-a	17
C1C2b17	2	0	6	0	2	1	4	0	0	8	15	12	1	2	0	8	31	0	18	74	0	0	1	0	10	0	0	56	1	1	27	0	7		C	1	C	C2	b	C-C-1-b	17
C1C2c17	1	0	4	0	0	1	2	0	0	47	22	9	0	8	1	4	13	2	27	74	0	0	0	0	3	0	2	85	0	1	43	0	6		C	1	C	C2	c	C-C-1-c	17
C1C3a4	0	0	0	0	0	0	5	0	0	7	22	2	0	8	0	0	6	1	9	46	0	0	0	0	0	0	0	27	5	0	22	0	2		C	1	C	C3	a	C-C-1-a	4
C1C3b4	0	0	0	0	1	0	3	0	0	13	29	4	0	8	0	11	32	1	10	73	0	0	0	0	1	0	0	27	0	0	20	0	1		C	1	C	C3	b	C-C-1-b	4
C1C3c4	2	0	0	0	0	0	3	0	0	43	52	13	0	8	0	1	11	4	14	76	0	0	0	0	1	0	2	68	0	0	41	0	4		C	1	C	C3	c	C-C-1-c	4
C1C4a2	0	0	2	0	0	2	8	0	0	1	29	10	0	0	0	2	8	0	7	46	1	16	0	14	1	0	0	27	4	1	24	0	1		C	1	C	C4	a	C-C-1-a	2
C1C4b2	2	0	3	0	0	1	11	0	0	4	32	11	1	0	0	6	25	0	6	65	0	14	2	17	4	0	0	33	0	1	22	0	0		C	1	C	C4	b	C-C-1-b	2
C1C4c2	7	0	0	0	0	1	0	0	0	33	32	12	0	0	0	6	9	0	14	82	0	14	0	25	3	0	10	59	0	0	45	0	1		C	1	C	C4	c	C-C-1-c	2
C1C5a19	0	0	2	0	0	1	3	0	0	3	70	11	0	2	0	0	9	0	6	43	1	0	0	0	0	0	0	24	1	0	9	0	0		C	1	C	C5	a	C-C-1-a	19
C1C5b19	0	0	3	0	1	5	3	0	0	5	71	15	0	2	0	8	18	0	6	49	0	0	1	0	1	0	0	27	2	2	13	0	0		C	1	C	C5	b	C-C-1-b	19
C1C5c19	3	0	7	0	0	2	1	0	0	56	84	0	0	5	0	2	6	0	13	85	3	0	0	0	3	0	0	65	0	0	29	0	0		C	1	C	C5	c	C-C-1-c	19
C1T1-1a7	0	0	1	0	0	0	8	0	0	6	55	4	0	0	0	1	18	0	6	38	0	11	0	0	0	2	0	23	5	0	17	0	2		C	1	T1	T1-1	a	C-T1-1-a	7
C1T1-1b7	0	0	1	0	0	0	9	0	0	7	68	1	0	0	0	6	34	0	15	59	1	10	1	0	3	0	0	35	1	7	27	0	2		C	1	T1	T1-1	b	C-T1-1-b	7
C1T1-1c7	6	0	0	0	0	0	0	0	0	33	47	15	0	3	0	1	19	2	20	71	0	16	0	0	1	0	5	61	0	0	45	0	2		C	1	T1	T1-1	c	C-T1-1-c	7
C1T1-2a6	0	0	0	0	0	0	0	0	0	2	65	0	0	1	0	0	4	0	8	29	0	6	0	0	0	0	0	25	3	0	19	0	1		C	1	T1	T1-2	a	C-T1-1-a	6
C1T1-2b6	0	0	0	0	0	1	1	0	0	4	83	0	0	1	0	1	25	0	11	51	0	2	0	0	2	0	0	23	0	1	23	0	0		C	1	T1	T1-2	b	C-T1-1-b	6
C1T1-2c6	0	0	0	0	1	1	1	0	0	33	66	2	0	0	0	1	6	0	19	32	1	1	0	0	2	0	0	29	0	0	38	0	1		C	1	T1	T1-2	c	C-T1-1-c	6
C1T1-3a12	3	0	0	0	0	2	2	0	0	3	41	0	0	2	0	2	10	0	12	49	0	6	0	0	3	0	0	20	4	0	22	0	0		C	1	T1	T1-3	a	C-T1-1-a	12
C1T1-3b12	2	0	0	0	1	3	3	0	0	9	49	1	1	3	0	7	24	0	15	68	0	7	0	0	6	0	0	25	0	0	27	0	0		C	1	T1	T1-3	b	C-T1-1-b	12
C1T1-3c12	2	0	1	0	0	3	1	0	0	30	39	0	0	3	0	2	13	0	18	77	1	7	0	0	4	0	1	39	0	0	51	0	0		C	1	T1	T1-3	c	C-T1-1-c	12
C1T1-4a25	0	0	2	0	0	0	2	0	0	1	35	3	0	1	0	1	7	2	7	60	0	0	0	0	1	0	0	32	0	0	17	0	0		C	1	T1	T1-4	a	C-T1-1-a	25
C1T1-4b25	0	0	5	0	0	2	2	0	0	2	13	6	0	0	0	7	15	2	8	63	0	0	0	0	7	0	0	31	1	14	27	0	0		C	1	T1	T1-4	b	C-T1-1-b	25
C1T1-4c25	4	0	2	0	0	0	1	0	0	49	63	19	0	5	0	9	6	0	15	79	0	27	0	0	0	0	5	64	0	0	28	0	14		C	1	T1	T1-4	c	C-T1-1-c	25
C1T1-5a14	0	0	4	0	0	0	12	1	0	6	51	5	1	0	0	4	17	0	9	49	0	1	0	0	2	0	0	26	3	0	19	0	0		C	1	T1	T1-5	a	C-T1-1-a	14
C1T1-5b14	0	0	6	0	1	0	11	0	0	16	54	4	1	0	0	12	36	0	11	74	0	1	0	0	10	0	0	39	3	0	20	0	0		C	1	T1	T1-5	b	C-T1-1-b	14
C1T1-5c14	4	0	1	0	0	0	0	0	0	48	46	4	1	0	0	1	5	0	19	84	1	0	0	0	1	0	12	68	1	0	50	0	0		C	1	T1	T1-5	c	C-T1-1-c	14
C1T2-1a8	1	0	2	0	2	0	2	0	0	6	55	7	0	2	0	7	17	0	14	55	0	1	0	0	1	0	0	36	8	1	8	0	2		C	1	T2	T2-1	a	C-T2-1-a	8
C1T2-1b8	4	0	0	0	1	0	3	0	0	17	61	8	0	6	0	13	40	0	16	73	0	0	0	0	31	0	0	35	0	1	16	0	2		C	1	T2	T2-1	b	C-T2-1-b	8
C1T2-1c8	6	0	2	0	2	1	3	8	0	60	66	4	0	7	0	10	30	2	26	77	1	0	0	0	2	0	0	73	0	1	40	0	4		C	1	T2	T2-1	c	C-T2-1-c	8
C1T2-2a35	0	0	3	0	0	0	11	0	0	2	57	0	0	6	0	0	10	0	10	34	0	10	0	0	0	0	0	20	3	1	11	0	1		C	1	T2	T2-2	a	C-T2-1-a	35
C1T2-2b35	6	0	3	0	0	0	13	0	0	6	67	1	0	2	0	7	31	0	12	63	0	8	0	0	3	0	0	28	0	1	10	0	1		C	1	T2	T2-2	b	C-T2-1-b	35
C1T2-2c35	13	0	1	0	0	0	0	0	0	35	69	1	0	4	0	0	5	0	24	81	1	12	0	0	1	0	8	49	0	0	28	0	1		C	1	T2	T2-2	c	C-T2-1-c	35
C1T2-3a29	6	0	1	0	1	2	8	0	0	5	39	4	0	1	0	3	14	0	4	61	1	2	0	0	0	0	0	33	11	1	27	0	0		C	1	T2	T2-3	a	C-T2-1-a	29
C1T2-3b29	10	0	1	0	2	1	10	0	0	5	48	5	0	5	0	9	34	0	4	69	0	3	0	0	14	0	0	34	5	1	29	0	0		C	1	T2	T2-3	b	C-T2-1-b	29
C1T2-3c29	23	0	2	0	0	0	1	0	0	47	29	13	0	4	0	2	14	0	9	85	4	4	0	0	2	0	5	43	0	1	66	0	0		C	1	T2	T2-3	c	C-T2-1-c	29
C1T2-4a10	1	0	0	0	0	0	7	0	0	6	33	11	0	5	0	4	6	0	15	59	0	2	0	0	2	0	0	28	4	0	19	0	1		C	1	T2	T2-4	a	C-T2-1-a	10
C1T2-4b10	1	0	3	0	0	0	7	0	0	8	27	9	3	5	0	6	23	0	13	71	1	2	0	0	8	0	0	40	0	11	25	0	1		C	1	T2	T2-4	b	C-T2-1-b	10
C1T2-4c10	1	0	0	0	0	0	1	0	0	44	16	18	0	4	1	1	1	0	31	90	0	1	0	0	0	0	1	72	0	0	45	0	0		C	1	T2	T2-4	c	C-T2-1-c	10
C1T2-5a15	0	0	2	0	0	2	7	0	0	4	75	10	0	4	0	3	5	0	10	43	3	0	0	0	0	0	0	29	1	0	17	0	3		C	1	T2	T2-5	a	C-T2-1-a	15
C1T2-5b15	1	0	4	0	1	2	4	0	0	11	89	11	0	2	0	7	10	0	11	66	0	0	0	0	8	0	0	30	1	2	20	0	2		C	1	T2	T2-5	b	C-T2-1-b	15
C1T2-5c15	2	0	0	0	2	3	2	0	0	26	55	0	0	2	0	3	13	0	13	79	1	2	0	0	0	0	3	42	0	0	47	0	2		C	1	T2	T2-5	c	C-T2-1-c	15
C2C1a28	2	0	1	0	0	1	2	0	0	3	59	2	1	2	0	3	22	0	0	49	0	16	0	0	2	0	0	17	3	0	16	0	5		C	2	C	C1	a	C-C-2-a	28
C2C1b28	3	0	1	0	1	1	5	2	1	6	62	7	0	3	0	18	46	0	1	74	2	19	0	0	22	0	0	23	1	0	25	0	5		C	2	C	C1	b	C-C-2-b	28
C2C1c28	8	0	1	0	0	2	1	0	0	38	66	50	0	4	0	18	42	0	1	108	2	20	0	0	9	0	0	36	0	0	38	0	5		C	2	C	C1	c	C-C-2-c	28
C2C2a9	2	0	9	0	1	1	8	0	0	3	41	3	0	3	0	1	18	0	9	62	0	10	0	0	8	0	0	32	6	7	23	0	5		C	2	C	C2	a	C-C-2-a	9
C2C2b9	4	0	10	0	0	0	9	0	4	22	41	10	1	2	0	17	44	0	13	89	0	10	1	0	28	0	0	42	1	55	29	0	7		C	2	C	C2	b	C-C-2-b	9
C2C2c9	6	0	6	0	0	0	1	0	0	57	53	6	0	3	0	20	18	0	13	99	0	8	0	0	3	0	6	40	0	1	56	0	8		C	2	C	C2	c	C-C-2-c	9
C2C3a5	2	0	2	0	3	1	11	0	0	3	37	0	0	1	2	4	13	0	12	46	0	9	0	0	2	0	0	40	8	1	15	0	1		C	2	C	C3	a	C-C-2-a	5
C2C3b5	5	0	3	0	3	0	13	0	3	9	38	3	0	2	2	19	26	0	14	68	0	9	0	0	15	0	0	54	2	2	27	0	1		C	2	C	C3	b	C-C-2-b	5
C2C3c5	7	0	1	0	3	0	2	0	0	32	43	6	0	6	4	15	11	0	18	90	2	11	0	0	4	0	4	58	0	2	53	0	1		C	2	C	C3	c	C-C-2-c	5
C2C4a3	4	0	6	0	1	0	17	0	0	5	19	1	0	0	0	11	27	0	18	41	1	22	0	0	2	0	0	45	4	2	29	0	4		C	2	C	C4	a	C-C-2-a	3
C2C4b3	7	0	4	0	4	0	12	0	0	9	23	3	0	0	0	20	38	0	18	50	0	24	0	0	7	0	0	59	0	2	42	0	4		C	2	C	C4	b	C-C-2-b	3
C2C4c3	7	0	3	0	3	0	3	0	0	42	19	13	0	2	0	18	22	0	22	82	5	24	0	0	3	0	8	67	0	1	43	0	6		C	2	C	C4	c	C-C-2-c	3
C2C5a30	0	0	5	0	0	2	5	0	0	6	47	1	0	1	0	1	19	0	7	55	2	2	0	0	2	0	0	33	3	0	15	0	2		C	2	C	C5	a	C-C-2-a	30
C2C5b30	2	0	6	0	4	2	4	0	0	19	45	6	0	1	0	13	24	0	6	71	0	5	0	0	17	0	0	47	1	4	32	0	2		C	2	C	C5	b	C-C-2-b	30
C2C5c30	3	0	9	0	0	2	2	0	0	59	48	10	1	0	0	11	10	0	5	77	3	4	0	0	2	0	0	55	0	1	55	0	3		C	2	C	C5	c	C-C-2-c	30
C2T1-1a21	1	0	6	0	0	11	2	1	0	5	24	4	0	0	0	3	33	0	9	82	0	8	0	0	0	0	0	47	2	0	32	0	5		C	2	T1	T1-1	a	C-T1-2-a	21
C2T1-1b21	5	0	4	0	5	9	6	0	3	13	12	86	0	0	0	31	67	0	15	80	0	10	0	0	62	0	0	55	0	8	43	0	5		C	2	T1	T1-1	b	C-T1-2-b	21
C2T1-1c21	7	0	4	0	5	0	3	0	0	41	14	23	0	1	0	14	27	1	18	96	4	6	0	0	7	0	0	69	0	0	71	0	8		C	2	T1	T1-1	c	C-T1-2-c	21
C2T1-2a1	1	0	0	0	0	2	4	0	0	4	72	0	1	1	0	4	6	0	9	56	1	0	0	10	5	0	0	18	4	3	25	0	3		C	2	T1	T1-2	a	C-T1-2-a	1
C2T1-2b1	7	0	1	0	2	0	6	0	0	13	68	4	0	2	0	17	19	0	10	81	0	0	0	11	22	0	0	23	2	1	31	0	2		C	2	T1	T1-2	b	C-T1-2-b	1
C2T1-2c1	4	0	0	0	0	1	3	0	0	51	57	7	1	3	0	7	3	0	15	76	0	0	0	17	2	0	1	27	0	0	51	0	3		C	2	T1	T1-2	c	C-T1-2-c	1
C2T1-3a11	4	0	4	0	0	0	5	0	0	5	27	1	0	1	0	4	28	0	10	72	2	10	0	0	4	0	0	44	0	0	27	0	0		C	2	T1	T1-3	a	C-T1-2-a	11
C2T1-3b11	6	0	3	0	1	0	5	1	0	10	30	12	0	1	0	27	51	0	8	79	0	11	0	0	22	0	0	49	0	0	40	0	0		C	2	T1	T1-3	b	C-T1-2-b	11
C2T1-3c11	9	0	0	0	0	1	0	0	0	59	30	23	0	3	1	9	19	0	9	95	2	11	0	0	2	0	4	72	0	0	62	0	0		C	2	T1	T1-3	c	C-T1-2-c	11
C2T1-4a23	1	0	1	0	2	1	2	0	0	6	50	1	1	0	0	2	18	0	3	69	2	11	0	0	1	0	0	29	4	39	9	0	1		C	2	T1	T1-4	a	C-T1-2-a	23
C2T1-4b23	2	0	1	0	3	0	3	0	0	13	55	6	1	3	0	22	38	0	6	72	1	12	0	0	18	0	0	28	4	28	16	0	2		C	2	T1	T1-4	b	C-T1-2-b	23
C2T1-4c23	2	0	0	0	1	0	0	0	0	45	44	20	1	1	0	2	21	0	7	70	4	17	0	0	2	0	0	34	1	0	25	0	1		C	2	T1	T1-4	c	C-T1-2-c	23
C2T1-5a13	0	0	3	0	1	0	3	0	0	9	30	14	0	0	0	1	18	0	8	52	3	0	0	0	2	0	0	43	0	0	50	0	2		C	2	T1	T1-5	a	C-T1-2-a	13
C2T1-5b13	2	0	2	0	4	0	5	0	0	16	35	24	0	4	0	15	29	0	4	73	0	0	0	0	6	0	0	48	0	0	30	0	2		C	2	T1	T1-5	b	C-T1-2-b	13
C2T1-5c13	7	0	1	0	1	0	4	0	0	50	38	14	1	0	0	2	22	0	4	84	3	0	0	0	2	0	2	52	0	1	45	0	2		C	2	T1	T1-5	c	C-T1-2-c	13
C2T2-1a34	3	0	1	0	3	4	6	0	0	3	23	4	0	0	0	12	25	0	19	63	0	8	0	0	6	0	0	61	3	0	13	0	3		C	2	T2	T2-1	a	C-T2-2-a	34
C2T2-1b34	10	0	0	0	3	2	7	0	1	5	47	24	0	0	0	5	65	0	18	89	0	11	0	0	2	1	0	69	2	12	30	0	3		C	2	T2	T2-1	b	C-T2-2-b	34
C2T2-1c34	10	0	0	0	3	0	6	0	0	40	30	18	0	1	0	10	23	1	28	99	1	10	0	0	0	0	0	68	0	0	40	0	5		C	2	T2	T2-1	c	C-T2-2-c	34
C2T2-2a36	1	0	2	0	0	2	11	0	0	2	75	0	1	1	0	0	16	0	1	54	0	0	0	0	1	0	0	26	0	0	9	0	0		C	2	T2	T2-2	a	C-T2-2-a	36
C2T2-2b36	1	0	0	0	0	2	13	0	2	11	42	2	1	1	0	7	25	0	3	76	1	0	0	0	22	0	0	30	0	0	19	0	0		C	2	T2	T2-2	b	C-T2-2-b	36
C2T2-2c36	3	0	1	0	0	2	11	1	0	64	32	3	1	3	0	1	10	0	6	84	3	0	0	0	4	0	0	41	0	1	39	0	0		C	2	T2	T2-2	c	C-T2-2-c	36
C2T2-3a22	1	0	2	0	2	1	10	1	0	7	37	11	0	3	0	1	25	0	11	45	0	8	0	0	5	0	0	40	1	6	16	0	0		C	2	T2	T2-3	a	C-T2-2-a	22
C2T2-3b22	2	0	2	0	2	3	9	1	2	15	27	11	0	4	0	18	33	0	18	54	0	8	0	0	33	0	0	43	3	40	28	0	1		C	2	T2	T2-3	b	C-T2-2-b	22
C2T2-3c22	10	0	1	0	2	3	2	2	0	64	31	14	0	9	0	10	22	0	33	92	2	11	0	0	3	0	7	66	0	0	63	0	1		C	2	T2	T2-3	c	C-T2-2-c	22
C2T2-4a18	0	0	5	0	2	1	4	0	0	4	44	7	0	0	0	5	25	0	7	52	0	2	0	0	4	0	0	27	4	3	18	0	4		C	2	T2	T2-4	a	C-T2-2-a	18
C2T2-4b18	1	0	4	0	2	2	7	4	0	16	56	14	0	0	0	17	33	0	7	50	0	2	0	0	23	0	0	31	3	0	20	0	4		C	2	T2	T2-4	b	C-T2-2-b	18
C2T2-4c18	3	0	4	0	2	0	0	0	0	57	55	22	0	4	0	13	24	0	14	90	2	2	0	0	4	0	4	43	0	1	42	0	4		C	2	T2	T2-4	c	C-T2-2-c	18
C2T2-5a16	1	0	5	0	0	1	5	0	0	3	18	5	0	2	0	4	28	0	12	89	0	1	0	0	2	0	0	45	0	1	15	0	3		C	2	T2	T2-5	a	C-T2-2-a	16
C2T2-5b16	2	0	13	0	2	1	7	0	0	16	19	21	2	5	0	40	43	0	16	81	0	2	0	0	9	0	0	62	40	0	27	0	2		C	2	T2	T2-5	b	C-T2-2-b	16
C2T2-5c16	5	0	4	0	2	2	7	0	0	52	18	26	1	3	0	28	13	0	19	94	1	3	0	0	2	0	0	78	0	0	48	0	4		C	2	T2	T2-5	c	C-T2-2-c	16
C3FC324	0	0	2	0	0	0	1	0	0	33	4	15	0	0	0	0	2	4	16	63	0	0	0	0	0	0	0	76	0	0	53	0	0		C	3	FC	FC	3	C-FC-3-3	24
C3FC326	0	0	0	0	1	1	0	0	0	32	22	8	1	0	0	1	2	0	13	57	0	15	0	0	0	0	4	33	0	0	41	0	13		C	3	FC	FC	3	C-FC-3-3	26
C3FC327	11	0	5	0	1	3	0	0	0	48	52	15	1	0	0	4	16	0	17	78	2	12	0	0	6	0	6	42	1	0	24	0	1		C	3	FC	FC	3	C-FC-3-3	27
C3FC331	2	0	2	0	0	0	0	0	0	30	45	0	0	0	0	5	3	0	24	82	2	25	0	0	2	0	12	39	0	0	46	0	0		C	3	FC	FC	3	C-FC-3-3	31
C3FC332	4	0	8	0	0	0	0	0	0	30	55	0	0	0	0	9	7	0	24	36	0	12	0	0	2	0	4	33	0	0	35	0	1		C	3	FC	FC	3	C-FC-3-3	32
C3FC333	4	0	0	0	0	1	0	0	0	39	42	0	0	0	0	8	26	0	21	100	5	1	0	0	1	0	11	60	0	0	42	0	0		C	3	FC	FC	3	C-FC-3-3	33

## Sheet: Sheet2
aa	ag	ah	ane	ano	bc	bf	bl	bn	bp	bs	bwk	cal	ce	ch	ci	clav	con	cp	dl	dsp	ebsp	elm	ep	ma	mm	mol	my	pom	spg	spir	ti	ver	ws
Ascidiella aspersa	Aplidium glabrum	Asterocarpa humilis	Anemone sp.	Anomia sp.	Balanus crenatus	Bugula fulva	Botryllid sp.	Bugula neritina	Perforatus perforatus	Botryllus schlosseri	Bowerbankis sp.	Callopora dumerilii	Corella eumyota	Celleporella hyalina	Ciona intestinalis	Clavelina lepadiformis	Conopeum sp.	Cryptosula pallasiana	Diplosoma listerianum	Didemnid sp.	Encrusting bryozoan sp.	Austrominius modestus	Electra pilosa	Morchellium argus	Membranipora membranacea	Molgula sp.	Mytilus sp.	Spirobranchus sp.	Spong esp.	Spirorbis sp.	Tricellaria inopinata	Verruca stroemia	Watersipora subatra
